# Supplementary material for: Lactobacillus rhamnosus GG modifies the metabolome of pathobionts in gnotobiotic mice
Source: PubMed Central journal article supplement (PMC8176599; doi:10.1186/s12866-021-02178-2), 2021-06-03
Supplement: 12866_2021_2178_MOESM1_ESM.pdf [file 12866_2021_2178_MOESM1_ESM.pdf]

**Supplementary Tables.**

***Lactobacillus rhamnosus* GG modifies the metabolome of pathobionts in  
gnotobiotic mice**

Jinhee Kim<sup>+</sup>, Iyshwarya Balasubramanian<sup>+</sup>, Sheila Bandyopadhyay, Ian Nadler, Rajbir Singh, Danielle Harlan, Amanda Bumber, Yuling He, Lee J. Kerkhof, Nan Gao, Xiaoyang Su, Ronaldo P. Ferraris

<sup>+</sup>, equal contribution

**Supplementary Table 1A. Nutrient composition of autoclavable rodent pellets used in experiments optimizing the metabolite extraction procedure.**

|                            | <b>Chow diet<br/>(LabDiet® JL 5KA1)</b> |
|----------------------------|-----------------------------------------|
| <b>Macronutrients</b>      | <b>Total % kcal</b>                     |
| Proteins                   | 22.2                                    |
| Carbohydrates              | 61.6                                    |
| Fats (ether extract)       | 16.2                                    |
| Total                      | 100                                     |
| <b>Relevant amino acid</b> |                                         |
| <b>Tryptophan %</b>        | 0.23                                    |

Calculated values provided by the manufacturer, LabDiet®. Additional information may be obtained from [http://jackson.jax.org/rs/444-BUH-304/images/LabDiet\\_5K52.pdf](http://jackson.jax.org/rs/444-BUH-304/images/LabDiet_5K52.pdf)

**Supplementary Table 1B. Nutrient composition of the diet used in the LTS and PTS experiment.**

| <b>Macronutrients</b>                            | <b>L-Amino Acid Rodent diet<br/>(Research Diet A10021B Su-1.5V)</b> |                |
|--------------------------------------------------|---------------------------------------------------------------------|----------------|
|                                                  | Total (% g)                                                         | Total (% kcal) |
| Proteins                                         | 17.0                                                                | 17.7           |
| Carbohydrates                                    | 68.5                                                                | 70.6           |
| Lipids                                           | 5.0                                                                 | 11.7           |
| Total                                            |                                                                     | 100.0          |
| kcal/gm                                          | 3.8                                                                 |                |
| <b>Ingredient</b>                                | <b>g/kg diet</b>                                                    | <b>Kcal</b>    |
| <b>Protein</b>                                   |                                                                     |                |
| L-Amino Acids, total                             | 170                                                                 | 680            |
| L-Tryptophan                                     | 2                                                                   | 8              |
| <b>Carbohydrate</b>                              |                                                                     |                |
| Corn Starch                                      | 550.5                                                               | 2202           |
| Maltodextrin 10                                  | 125                                                                 | 500            |
| Sucrose                                          | 8.5                                                                 | 34             |
| <b>Fat</b>                                       |                                                                     |                |
| Corn Oil                                         | 50                                                                  | 450            |
| <b>Fiber</b>                                     |                                                                     |                |
| Cellulose                                        | 50                                                                  | 0              |
| <b>Mineral Mix S10001</b>                        |                                                                     |                |
| Sodium Bicarbonate                               | 35                                                                  | 0              |
| <b>Vitamin Mix V10001<br/>(10X Concentrated)</b> |                                                                     |                |
| Choline Bitartrate                               | 1.5                                                                 | 6              |
| <b>Dye</b>                                       |                                                                     |                |
| Blue dye                                         | 2                                                                   | 0              |
| <b>Total</b>                                     | <b>1000.05</b>                                                      | <b>3838</b>    |

This diet formulated by E. A. Ulman, Ph.D., Research Diets, Inc., 5/3/94 and 11/12/99.

**Supplementary Table 2.** Primer sequences used in RT-qPCR of mouse genes

| <b>Gene</b>                | <b>Forward primer (5' to 3')</b> | <b>Reverse primer (5' to 3')</b> |
|----------------------------|----------------------------------|----------------------------------|
| <i>Il1α</i>                | ACGTCAAGCAACGGGAAGAT             | AAGGTGCTGATCTGGGTTGG             |
| <i>Il1β</i>                | CCTTGGGCCTCAAAGGAAAG             | TCTTCTTCTTTGGGTATTGCTTGG         |
| <i>Tnfa</i>                | ACAAGCCTGTAGCCCACGTC             | CTTTGAGATCCATGCCGTTG             |
| <i>Il22</i>                | GTGACGACCAGAACATCCAGA            | AAACAGCAGGTCCAGTTCCC             |
| <i>Il22r1</i>              | ATTTGGGAGTGGAGAGGATG             | ACAGCTGCCCTGCTTCTTAT             |
| <i>Amphiregulin (Areg)</i> | CGGCATCGTTATCACAGTGC             | TGCACAGTCCCGTTTTCTTG             |
| <i>Il10</i>                | TCTCCCCTGTGAAAATAAGAGCA          | TTCATGGCCTTGTAGACACCT            |
| <i>Il12α</i>               | CGCAGCACTTCAGAATCACA             | CGCAGAGTCTCGCCATTATG             |
| <i>Il6</i>                 | AAATTTCTCTGGTCTTCTGGAG           | CGCACTAGGTTTGCCGAGTA             |
| <i>Il5</i>                 | AAGGATGCTTCTGCACTTGA             | ACACCAAGGAACTCTTGCA              |
| <i>Ifny</i>                | GCGTCATTGAATCACACCTGA            | CTGGACCTGTGGGTTGTTGA             |
| <i>Il13</i>                | CGGTGCCAAGATCTGTGTCT             | ACACTCCATACCATGCTGCC             |
| <i>Il17</i>                | ATCCCTCAAAGCTCAGCGTGTC           | GGGTCTTCATTGCGGTGGAGAG           |
| <i>Gata3</i>               | GAGGAGGAACGCTAATGGGG             | CGGGTCTGGATGCCTTCTTT             |
| <i>Zo1</i>                 | GGGAGGGTCAAATGAAGACA             | GGCATTCTGCTGGTTACAT              |
| <i>Cldn4</i>               | GGCTGCTTTGCTGCAACTGTC            | GAGCCGTGGCACCTTACACG             |
| <i>Vegfa</i>               | AAAGGCTTCAGTGTGGTCTGAGAG         | GGTTGGAACCGGCATCTTTATC           |
| <i>Cyp1a1</i>              | CTCTTCCCTGGATGCCTTCAA            | GGATGTGGCCCTTCTCAAATG            |
| <i>β-actin</i>             | TTGTTACCAACTGGGACGACATGG         | CTCGGGTGTGGAAGGTCTCAAACA         |

**Supplementary Table 3A.** VIP scores and regulation of fecal metabolites in LTS compared to PTS mice\*.

| Rank | Metabolites                   | VIP score | Upregulated in LTS | Downregulated in LTS |
|------|-------------------------------|-----------|--------------------|----------------------|
| 1    | N-Acetylputrescine_Pos        | 2.4135    | 0                  |                      |
| 2    | N-acetyl-glutamine_Neg        | 2.4023    | 0                  |                      |
| 3    | N-acetyl-glutamine_Pos        | 2.3843    | 0                  |                      |
| 4    | Sorbitol_Neg                  | 2.3584    |                    | 0                    |
| 5    | Guanine_Neg                   | 2.2516    |                    | 0                    |
| 6    | Levulinic Acid_Neg            | 1.9817    | 0                  |                      |
| 7    | Ornithine_Neg                 | 1.9768    |                    | 0                    |
| 8    | Acetyl leucine_Neg            | 1.9448    | 0                  |                      |
| 9    | Carnitine_Pos                 | 1.9265    | 0                  |                      |
| 10   | Guanine_Pos                   | 1.9016    |                    | 0                    |
| 11   | Pyroglutamate_Neg             | 1.8805    | 0                  |                      |
| 12   | Ornithine_Pos                 | 1.8693    |                    | 0                    |
| 13   | Citrulline_Pos                | 1.8571    |                    | 0                    |
| 14   | Histamine_Pos                 | 1.8032    | 0                  |                      |
| 15   | Ribitol_Neg                   | 1.8024    | 0                  |                      |
| 16   | Acetyl-arginine_Pos           | 1.7218    |                    | 0                    |
| 17   | Indolelactic acid_Neg         | 1.7069    | 0                  |                      |
| 18   | Guanidinoacetate_Pos          | 1.6693    |                    | 0                    |
| 19   | Nicotinate_Neg                | 1.632     | 0                  |                      |
| 20   | 2 2-dimethylsuccinic acid_Pos | 1.5725    | 0                  |                      |
| 21   | Citrulline_Neg                | 1.5516    |                    | 0                    |
| 22   | Hypoxanthine_Neg              | 1.5192    | 0                  |                      |
| 23   | Aspartate_Neg                 | 1.5182    | 0                  |                      |
| 24   | Adenine_Pos                   | 1.4747    |                    | 0                    |
| 25   | Cystine_Pos                   | 1.4368    |                    | 0                    |
| 26   | Adenine_Neg                   | 1.3983    |                    | 0                    |
| 27   | Xanthine_Neg                  | 1.3591    | 0                  |                      |
| 28   | Lysine_Pos                    | 1.3445    |                    | 0                    |
| 29   | Pyruvate_Neg                  | 1.338     |                    | 0                    |
| 30   | Isoleucine_Pos                | 1.3325    |                    | 0                    |
| 31   | Creatinine_Pos                | 1.3292    | 0                  |                      |
| 32   | Stearic acid_Neg              | 1.3119    | 0                  |                      |
| 33   | Hypoxanthine_Pos              | 1.2866    | 0                  |                      |
| 34   | Aspartate_Pos                 | 1.2728    | 0                  |                      |
| 35   | Proline_Pos                   | 1.2688    |                    | 0                    |
| 36   | Acetyl-Phenylalanine_Neg      | 1.2447    | 0                  |                      |
| 37   | Urocanic acid_Pos             | 1.2288    |                    | 0                    |
| 38   | Creatinine_Neg                | 1.2258    | 0                  |                      |

|    |                |        |   |
|----|----------------|--------|---|
| 39 | Isoleucine_Neg | 1.2094 | 0 |
|----|----------------|--------|---|

**Supplementary Table 3B.** VIP scores and regulation of fecal metabolites in GF compared to PTS mice\*.

| Rank | Metabolites                | VIP score | Upregulated in PTS | Downregulated in PTS |
|------|----------------------------|-----------|--------------------|----------------------|
| 1    | Ornithine_Pos              | 1.9391    | 0                  |                      |
| 2    | Betaine_Pos                | 1.9057    | 0                  |                      |
| 3    | Carnitine_Pos              | 1.869     | 0                  |                      |
| 4    | Citrulline_Neg             | 1.8386    | 0                  |                      |
| 5    | Ornithine_Neg              | 1.7347    | 0                  |                      |
| 6    | Glutamate_Pos              | 1.706     | 0                  |                      |
| 7    | Spermine_Pos               | 1.6971    | 0                  |                      |
| 8    | Quinic acid_Neg            | 1.6813    |                    | 0                    |
| 9    | Citrulline_Pos             | 1.6397    | 0                  |                      |
| 10   | Guanine_Neg                | 1.6342    | 0                  |                      |
| 11   | NG-dimethyl-L-arginine_Pos | 1.5952    | 0                  |                      |
| 12   | Ribitol_Neg                | 1.5864    |                    | 0                    |
| 13   | Biotin_Pos                 | 1.579     |                    | 0                    |
| 14   | Biotin_Neg                 | 1.5682    |                    | 0                    |
| 15   | 5-Methylcytosine_Pos       | 1.5563    |                    | 0                    |
| 16   | Glutamate_Neg              | 1.5462    | 0                  |                      |
| 17   | Histidine_Pos              | 1.5044    | 0                  |                      |
| 18   | Cytosine_Pos               | 1.4986    |                    | 0                    |
| 19   | Aspartate_Pos              | 1.4866    | 0                  |                      |
| 20   | Nicotinamide riboside_Pos  | 1.4604    | 0                  |                      |
| 21   | Creatinine_Neg             | 1.4354    |                    | 0                    |
| 22   | Nicotinate_Neg             | 1.435     | 0                  |                      |
| 23   | Sorbitol_Neg               | 1.427     |                    | 0                    |
| 24   | Adenine_Pos                | 1.4226    | 0                  |                      |
| 25   | Deoxyinosine_Pos           | 1.4176    |                    | 0                    |
| 26   | Adenine_Neg                | 1.4095    | 0                  |                      |
| 27   | Creatinine_Pos             | 1.3964    |                    | 0                    |
| 28   | Arginine_Neg               | 1.389     |                    | 0                    |
| 29   | Arginine_Pos               | 1.3792    |                    | 0                    |
| 30   | Histamine_Pos              | 1.3588    | 0                  |                      |
| 31   | Inositol_Neg               | 1.3464    |                    | 0                    |
| 32   | Guanosine_Neg              | 1.3428    |                    | 0                    |
| 33   | Thymidine_Neg              | 1.3417    |                    | 0                    |
| 34   | Inosine_Neg                | 1.3415    |                    | 0                    |
| 35   | Guanidinoacetate_Pos       | 1.3369    | 0                  |                      |
| 36   | Glutaconic acid_Neg        | 1.3359    |                    | 0                    |
| 37   | Deoxyguanosine_Pos         | 1.3354    |                    | 0                    |

|    |                                   |        |   |   |
|----|-----------------------------------|--------|---|---|
| 38 | D-Pantethine_Pos                  | 1.3325 | 0 |   |
| 39 | Cytidine_Pos                      | 1.3285 |   | 0 |
| 40 | 1-Methylimidazole acetic acid_Pos | 1.3104 | 0 |   |
| 41 | Uridine_Neg                       | 1.3066 |   | 0 |
| 42 | Deoxyinosine_Neg                  | 1.2975 |   | 0 |
| 43 | Citrate_Neg                       | 1.2937 |   | 0 |
| 44 | Guanosine_Pos                     | 1.2721 |   | 0 |
| 45 | Cytidine_Neg                      | 1.2693 |   | 0 |
| 46 | Isoleucine_Pos                    | 1.2606 | 0 |   |
| 47 | Deoxyguanosine_Neg                | 1.2471 |   | 0 |
| 48 | Threonic acid_Neg                 | 1.2177 |   | 0 |
| 49 | Proline_Pos                       | 1.2134 | 0 |   |



**Supplementary Table 3C.** VIP scores and regulation of fecal metabolites in GF compared to LTS mice\*.

| Rank | Metabolites                   | VIP score | Upregulated in LTS | Downregulated in LTS |
|------|-------------------------------|-----------|--------------------|----------------------|
| 1    | Carnitine_Pos                 | 1.8916    | 0                  |                      |
| 2    | N-Acetylputrescine_Pos        | 1.8861    | 0                  |                      |
| 3    | Sorbitol_Neg                  | 1.8545    |                    | 0                    |
| 4    | N-acetyl-glutamine_Pos        | 1.8438    | 0                  |                      |
| 5    | N-acetyl-glutamine_Neg        | 1.8231    | 0                  |                      |
| 6    | Betaine_Pos                   | 1.8222    | 0                  |                      |
| 7    | 2,2-dimethylsuccinic acid_Pos | 1.8195    | 0                  |                      |
| 8    | Glutamate_Pos                 | 1.6922    | 0                  |                      |
| 9    | Levulinic Acid_Neg            | 1.68      | 0                  |                      |
| 10   | Thymidine_Neg                 | 1.6798    |                    | 0                    |
| 11   | Aspartate_Pos                 | 1.6538    | 0                  |                      |
| 12   | Pyruvate_Neg                  | 1.6179    |                    | 0                    |
| 13   | Histamine_Pos                 | 1.6126    | 0                  |                      |
| 14   | Glutamate_Neg                 | 1.6063    | 0                  |                      |
| 15   | Nicotinate_Neg                | 1.5997    | 0                  |                      |
| 16   | Guanine_Pos                   | 1.5977    |                    | 0                    |
| 17   | Acetyl leucine_Neg            | 1.5951    | 0                  |                      |
| 18   | Quinic acid_Neg               | 1.5884    |                    | 0                    |
| 19   | Deoxyinosine_Pos              | 1.585     |                    | 0                    |
| 20   | 5-Methylcytosine_Pos          | 1.5568    |                    | 0                    |
| 21   | Histidine_Pos                 | 1.5319    | 0                  |                      |
| 22   | N-acetyl-glutamate_Neg        | 1.5278    | 0                  |                      |
| 23   | Biotin_Neg                    | 1.5184    |                    | 0                    |
| 24   | Cytosine_Pos                  | 1.5149    |                    | 0                    |
| 25   | NG-dimethyl-L-arginine_Pos    | 1.5023    | 0                  |                      |
| 26   | Biotin_Pos                    | 1.4812    |                    | 0                    |
| 27   | Thymine_Pos                   | 1.4809    |                    | 0                    |
| 28   | Thymine_Neg                   | 1.4606    | 0                  |                      |
| 29   | Citrulline_Neg                | 1.4601    | 0                  |                      |
| 30   | Glucosamine_Pos               | 1.434     |                    | 0                    |
| 31   | Pyroglutamate_Neg             | 1.4283    | 0                  |                      |
| 32   | Nicotinamide riboside_Pos     | 1.4236    | 0                  |                      |
| 33   | Spermine_Pos                  | 1.4184    | 0                  |                      |
| 34   | Guanosine_Neg                 | 1.3791    |                    | 0                    |
| 35   | Leucic acid_Neg               | 1.3596    | 0                  |                      |
| 36   | Deoxyguanosine_Pos            | 1.3534    |                    | 0                    |
| 37   | Deoxyinosine_Neg              | 1.3418    |                    | 0                    |
| 38   | Uridine_Neg                   | 1.3411    |                    | 0                    |

|    |                            |        |   |   |
|----|----------------------------|--------|---|---|
| 39 | Guanosine_Pos              | 1.3262 |   | 0 |
| 40 | Indolelactic acid_Neg      | 1.3163 | 0 |   |
| 41 | 5- Methylthioadenosine_Neg | 1.2986 |   | 0 |
| 42 | Cytidine_Neg               | 1.2939 |   | 0 |
| 43 | Citrulline_Pos             | 1.2869 | 0 |   |
| 44 | Ornithine_Pos              | 1.2406 | 0 |   |
| 45 | Cytidine_Pos               | 1.2365 |   | 0 |
| 46 | Trimethylamine oxide_Pos   | 1.2335 |   | 0 |
| 47 | Nicotinate_Pos             | 1.2324 | 0 |   |
| 48 | Serine_Neg                 | 1.221  |   | 0 |

**Supplementary Table 3D.** Highly significant VIP metabolites that are up or downregulated with PTS relative to GF, with LTS relative to GF, and LTS relative to PTS fall into four categories: (1) those that are upregulated in both PTS and LTS, (2) downregulated in both PTS and LTS, (3) upregulated in PTS or downregulated in LTS, and (4) upregulated in LTS\*.

| METABOLITE, MODE                                           | VIP rank, GF vs PTS | VIP rank, GF vs LTS | VIP rank, PTS vs LTS | statistical comparison** |
|------------------------------------------------------------|---------------------|---------------------|----------------------|--------------------------|
| <b>1. upregulated in both PTS and LTS compared to GF</b>   |                     |                     |                      |                          |
| carnitine, pos                                             | 3, high PTS         | 1, high LTS         | 9, high LTS          | LTS>>>PTS>>>GF           |
| betaine, pos                                               | 2, high PTS         | 6, high LTS         | 45, low LTS          | PTS>>>LTS>>>GF           |
| glutamate, neg                                             | 16, high PTS        | 14, high LTS        | not ranked           | LTS=PTS>>>GF             |
| glutamate, pos                                             | 6, high PTS         | 8, high LTS         | not ranked           | LTS=PTS>>GF              |
| aspartate, neg                                             | not ranked          | not ranked          | 23, high LTS         | LTS>>PTS=GF              |
| aspartate, pos                                             | 19, high PTS        | 11, high LTS        | 34, high LTS         | LTS>PTS>>>GF             |
| nicotinate, pos                                            | 67, high PTS        | 47, high LTS        | not ranked           | LTS>PTS>>>GF             |
| nicotinate, neg                                            | 22, high PTS        | 15, high LTS        | 19, high LTS         | LTS>>>PTS>>>GF           |
| NG-dimethyl-L-arginine, pos                                | 11, high PTS        | 25, high LTS        | not ranked           | LTS=PTS>>> GF            |
| histidine, pos                                             | 17, high PTS        | 21, high LTS        | not ranked           | LTS=PTS>>>GF             |
| N-acetyl-glutamate, neg                                    | not ranked          | 22, high LTS        | 52, LTS=PTS          | LTS=PTS>>>GF             |
| spermine, pos                                              | 7, high PTS         | 33, high LTS        | not ranked           | PTS=LTS>>>GF             |
| <b>2. downregulated in both PTS and LTS compared to GF</b> |                     |                     |                      |                          |
| thymidine, neg                                             | 33, low PTS         | 10, low LTS         | 49, low LTS          | GF>>>PTS>LTS             |
| quinic acid, neg                                           | 8, low PTS          | 18, low LTS         | not ranked           | GF>>>PTS=LTS             |
| biotin, pos                                                | 13, low PTS         | 26, low LTS         | not ranked           | GF>>>PTS=LTS             |
| biotin, neg                                                | 14, low PTS         | 23, low LTS         | not ranked           | GF>>>PTS=LTS             |
| 5-methylcytosine, pos                                      | 15, low PTS         | 20, low LTS         | not ranked           | GF>>>PTS=LTS             |
| inosine, neg                                               | 34, low PTS         | 62, low LTS         | 53, low LTS          | GF>>>PTS=LTS             |
| guanosine, pos                                             | 44, low PTS         | 39, low LTS         | not ranked           | GF>>>PTS=LTS             |
| guanosine, neg                                             | 32, low PTS         | 34, low LTS         | not ranked           | GF>>>PTS=LTS             |
| <b>3. upregulated in PTS or downregulated in LTS</b>       |                     |                     |                      |                          |
| guanine, pos                                               | not ranked          | 16, low LTS         | 10, low LTS          | GF=PTS>>>LTS             |
| guanine, neg                                               | 10, high PTS        | not ranked          | 5, low LTS           | PTS>>>GF=LTS             |
| ornithine, neg                                             | 5, high PTS         | not ranked          | 7, low LTS           | PTS>>>LTS>GF             |
| ornithine, pos                                             | 1, high PTS         | 44, high LTS        | 12, low LTS          | PTS>>>LTS>GF             |
| citrulline, pos                                            | 4, high PTS         | 29, high LTS        | 13, low LTS          | PTS>>>LTS>GF             |
| pyruvate, neg                                              | 72                  | 12, low LTS         | 29, low LTS          | GF=PTS >>LTS             |
| sorbitol, neg                                              | 23, low PTS         | 3, low LTS          | 4, low LTS           | GF>>>PTS>>>LTS           |
| isoleucine, pos                                            | 46, high PTS        | 30, low LTS         | 39, low LTS          | PTS>LTS>GF               |

| 4. upregulated in LTS         |              |              |              |                |
|-------------------------------|--------------|--------------|--------------|----------------|
| N-acetyl-putrescine, pos      | not ranked   | 2, high LTS  | 1, high LTS  | LTS>>>PTS>GF   |
| N-acetyl-glutamine, neg       | not ranked   | 4, high LTS  | 2, high LTS  | LTS>>>PTS=GF   |
| N-acetyl-glutamine, pos       | not ranked   | 5, high LTS  | 3, high LTS  | LTS>>>PTS=GF   |
| acetyl leucine, neg           | high PTS     | 17, high LTS | 8, high LTS  | LTS>>>PTS>>GF  |
| pyroglutamate, neg            | high PTS     | 31, high LTS | 11, high LTS | LTS>>>PTS>GF   |
| ribitol, neg                  | 12, low PTS  | not ranked   | 15, high LTS | LTS = GF>>>PTS |
| hypoxanthine, neg             | not ranked   | 70, high LTS | 22, high LTS | LTS>>>PTS>GF   |
| indolelactic acid, neg        | not ranked   | 40, high LTS | 17, high LTS | LTS>>>PTS=GF   |
| levulinic acid, neg           | 76, high PTS | 9, high LTS  | 6, high LTS  | LTS>>>PTS>>>GF |
| histamine, pos                | 30, high PTS | 13, high LTS | 14, high LTS | LTS>>>PTS>>>GF |
| 2,2-dimethylsuccinic acid,pos | 51, high PTS | 7, high LTS  | 20, high LTS | LTS>>>PTS>>>GF |

\* GF = germ-free; LTS = *Propionibacterium acnes*, *Turicibacter sanguinis*, and *Staphylococcus aureus* plus *Lactobacillus rhamnosus* GG; PTS = *Propionibacterium acnes*, *Turicibacter sanguinis*, and *Staphylococcus aureus*; VIP = variable's influence on projection; (pos) and (neg) refer to the positive and negative mode of LC-MS analysis, respectively.

\*\* number of >'s correspond to significance level, so > = p<0.05; >> = p<0.025; >>> = p<0.01

**Supplementary Table 4.** Accurate m/z and relative intensity values of peaks in the ms2 spectra of unidentified metabolites

| Figure                        | Feature          | m/z       | Relative Intensity |
|-------------------------------|------------------|-----------|--------------------|
| Fig. 5E, Supplemental Fig. 4A | 163.0607@3.68min | 71.01384  | 0.4389             |
|                               |                  | 85.02937  | 0.5183             |
|                               |                  | 163.0614  | 0.7340             |
| Fig. 5F, Supplemental Fig. 4C | 357.1028@9.68min | 57.03438  | 0.0374             |
|                               |                  | 59.0136   | 0.0717             |
|                               |                  | 69.03444  | 0.0034             |
|                               |                  | 71.0138   | 0.2396             |
|                               |                  | 72.993    | 0.0746             |
|                               |                  | 73.02945  | 0.0316             |
|                               |                  | 75.00867  | 0.9038             |
|                               |                  | 83.01374  | 0.0396             |
|                               |                  | 85.02937  | 0.1281             |
|                               |                  | 87.00861  | 0.0224             |
|                               |                  | 89.02429  | 0.0886             |
|                               |                  | 95.01363  | 0.0064             |
|                               |                  | 99.00866  | 0.0283             |
|                               |                  | 101.0243  | 0.1398             |
|                               |                  | 111.0086  | 0.0318             |
|                               |                  | 113.0243  | 0.0610             |
|                               |                  | 119.0347  | 0.0274             |
|                               |                  | 129.0192  | 0.2190             |
| 131.0352                      | 0.0042           |           |                    |
| 141.0192                      | 0.0237           |           |                    |
| 159.0298                      | 0.0589           |           |                    |
| 221.066                       | 0.0311           |           |                    |
| 357.1035                      | 0.0862           |           |                    |
| Supplemental Fig. 4A          | 237.0973@2.25min | 51.38644  | 0.4197             |
|                               |                  | 70.09301  | 0.4748             |
|                               |                  | 113.06578 | 0.5474             |
|                               |                  | 119.14967 | 0.5467             |
| Supplemental Fig. 4B          | 257.0772@9.08min | 82.029778 | 0.3624             |
|                               |                  | 84.045319 | 0.1364             |
|                               |                  | 102.05617 | 0.0595             |
|                               |                  | 109.07697 | 0.0677             |
|                               |                  | 110.02458 | 0.0364             |
|                               |                  | 113.07207 | 0.0869             |
|                               |                  | 127.05127 | 0.1856             |
|                               |                  | 128.03529 | 0.8771             |
|                               |                  | 146.04614 | 0.0115             |
|                               |                  | 169.09818 | 0.1414             |

|                      |                  |                                                                                                                                                                                                                                                                                                                  |                                                                                                                                                                                                                                              |
|----------------------|------------------|------------------------------------------------------------------------------------------------------------------------------------------------------------------------------------------------------------------------------------------------------------------------------------------------------------------|----------------------------------------------------------------------------------------------------------------------------------------------------------------------------------------------------------------------------------------------|
|                      |                  | 195.07753<br>213.08829<br>239.06747                                                                                                                                                                                                                                                                              | 0.0439<br>0.0642<br>0.0567                                                                                                                                                                                                                   |
| Supplemental Fig. 4B | 287.0764@4.76min | 65.03968<br>67.018929<br>69.0345<br>95.013687<br>95.050179<br>97.029625<br>105.03448<br>108.02132<br>109.02956<br>111.04471<br>113.02443<br>121.02934<br>123.04514<br>125.02436<br>143.03485<br>149.02458<br>153.01907<br>153.05618<br>167.03473<br>169.05081<br>199.06154<br>209.04472<br>239.0556<br>287.07657 | 0.0468<br>0.0642<br>0.1702<br>0.0637<br>0.2849<br>0.3121<br>0.0830<br>0.0446<br>0.2438<br>0.0568<br>0.1095<br>0.2361<br>0.5428<br>0.2147<br>0.0954<br>0.2120<br>0.0852<br>0.1032<br>0.3604<br>0.1987<br>0.1014<br>0.0709<br>0.0597<br>0.2046 |
| Supplemental Fig. 4C | 340.1140@9.15min | 82.029846<br>109.04054<br>114.05594<br>127.0512<br>137.07202<br>153.06703                                                                                                                                                                                                                                        | 0.0557<br>0.0837<br>0.1298<br>0.9847<br>0.0417<br>0.0414                                                                                                                                                                                     |
| Supplemental Fig. 4D | 288.192@6.16min  | 59.01371                                                                                                                                                                                                                                                                                                         | 1.0000                                                                                                                                                                                                                                       |
| Supplemental Fig. 4D | 201.0877@4.45min | 51.297226<br>53.253372<br>69.648727<br>77.349976<br>88.040443<br>98.061676<br>112.04061<br>115.08768<br>128.95592                                                                                                                                                                                                | 0.0158<br>0.0173<br>0.0161<br>0.0150<br>0.7645<br>0.0298<br>0.0621<br>0.6382<br>0.0185                                                                                                                                                       |

|  |  |           |        |
|--|--|-----------|--------|
|  |  | 151.82323 | 0.0175 |
|  |  | 159.07768 | 0.0431 |
