# Supplementary material for: Lactobacillus rhamnosus GG modifies the metabolome of pathobionts in gnotobiotic mice
Source: PubMed Central journal article supplement (PMC8176599; doi:10.1186/s12866-021-02178-2), 2021-06-03
Supplement: 12866_2021_2178_MOESM2_ESM.pdf [file 12866_2021_2178_MOESM2_ESM.pdf]

## **Supplementary Figures.**

### ***Lactobacillus rhamnosus* GG modifies the metabolome of pathobionts in gnotobiotic mice**

Jinhee Kim<sup>+</sup>, Iyshwarya Balasubramanian<sup>+</sup>, Sheila Bandyopadhyay, Ian Nadler, Rajbir Singh, Danielle Harlan, Amanda Bumber, Yuling He, Lee J. Kerkhof, Nan Gao, Xiaoyang Su, Ronaldo P. Ferraris<sup>+</sup>, equal contribution

Kim et al. Supplementary Figure 1

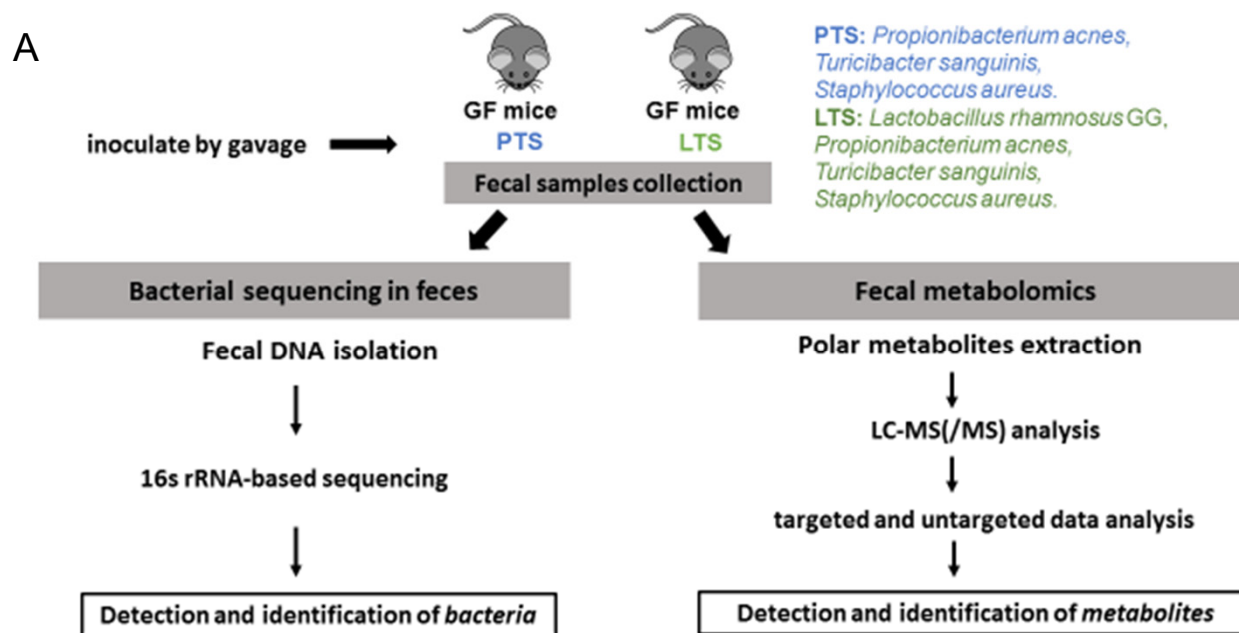

**B**

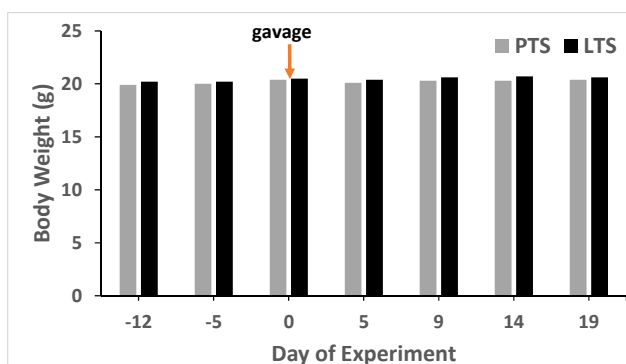

**C**

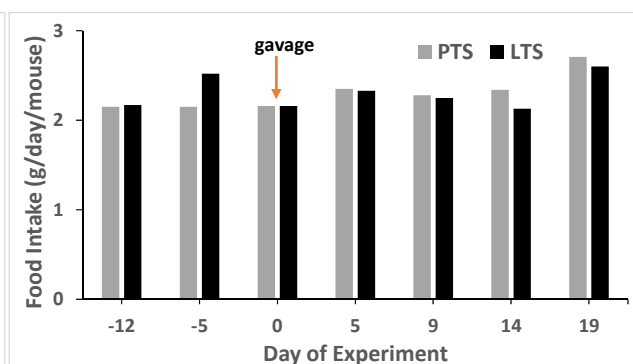

**Supplementary Fig 1. Experimental design and clinical parameters (A)**

Schematic diagram of experimental plan (B) Body weights as a function of age of mice before and after gavage with PTS or LTS (C) Diet consumption by mice over the course of the study.

Kim et al. Supplementary Figure 2

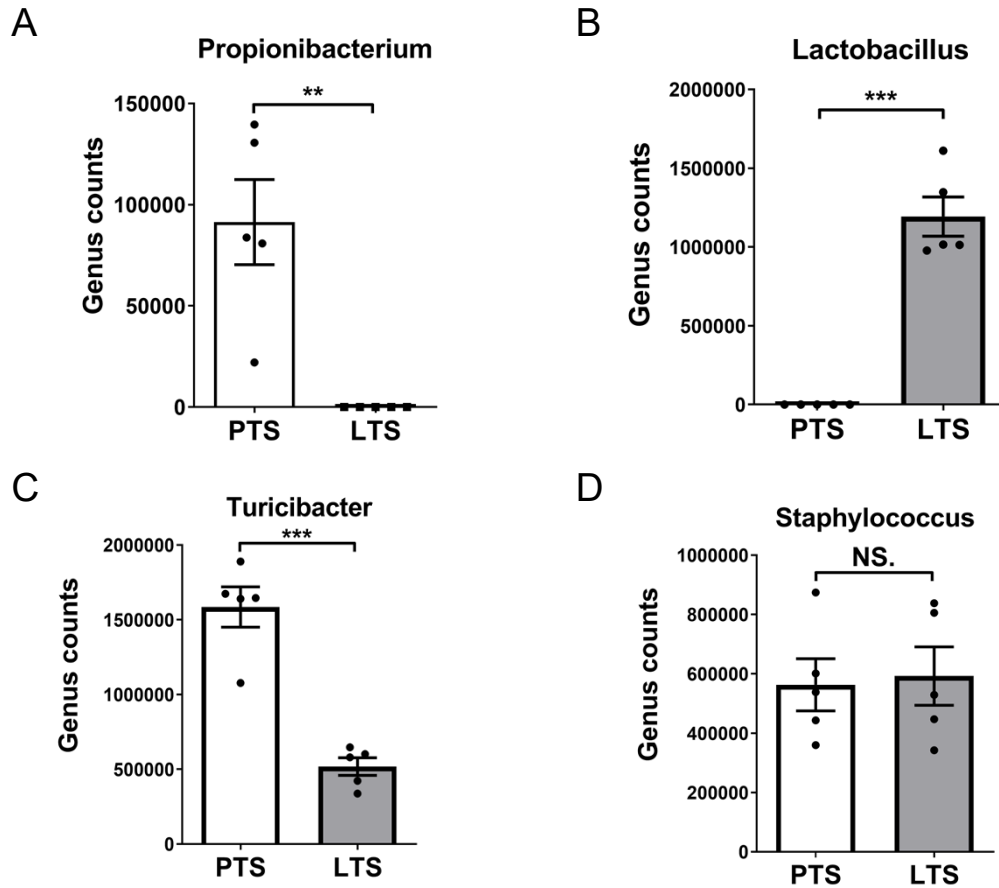

**Supplementary Fig 2. Abundance of pathobionts when coassociated with LGG.** Propionibacterium (A), Lactobacillus (B), Turicibacter (C), and Staphylococcus (D) abundance was determined in the feces from PTS (n=5) and LTS (n=5) mice by 16S amplicon profiling.

Kim et al. Supplementary Figure 3

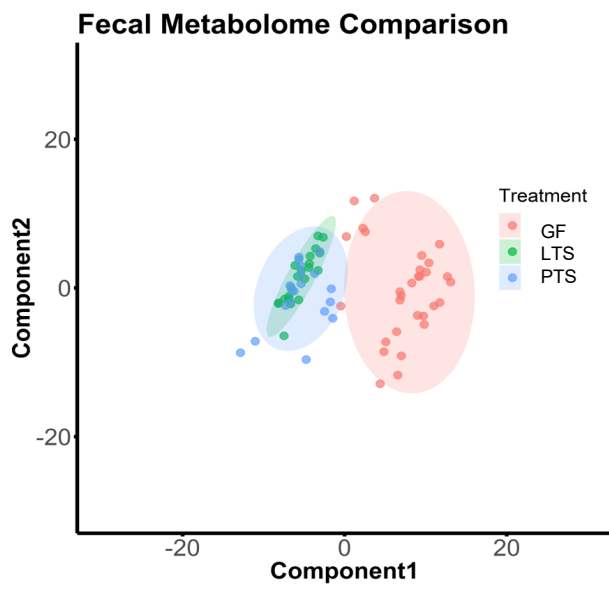

**Supplementary Fig 3.** Unsupervised principal component analysis (PCA) of fecal metabolites from GF, PTS, and LTS mice.

## Kim et al. Supplementary Figure 4

### A. Upregulated in both LTS and PTS

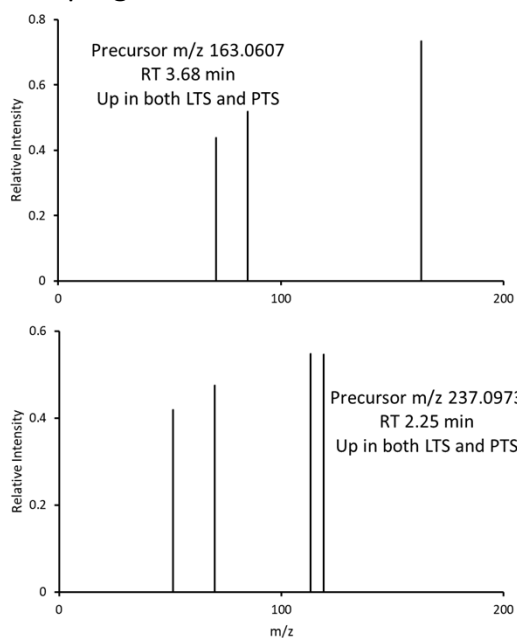

### B. Downregulated in both LTS and PTS

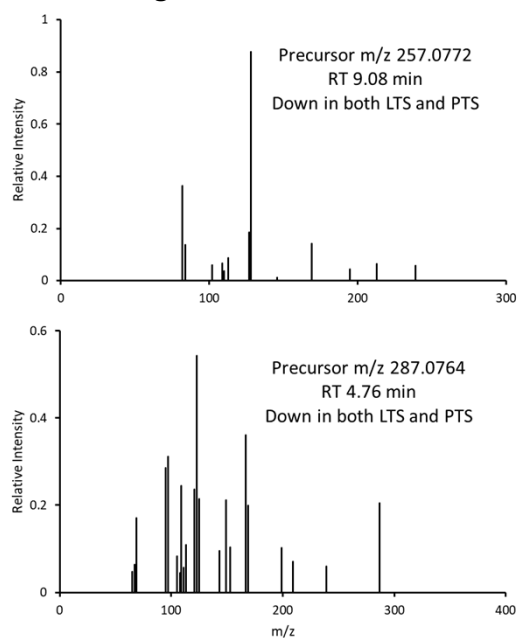

### C. Downregulated LTS compared to PTS and/or GF

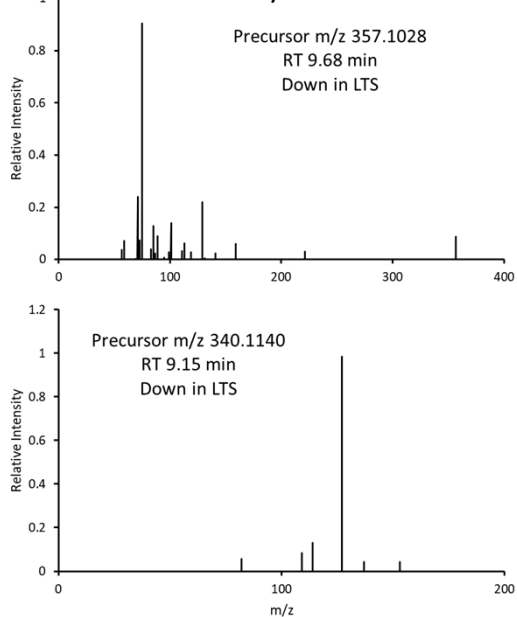

### D. Upregulated LTS compared to PTS and/or GF

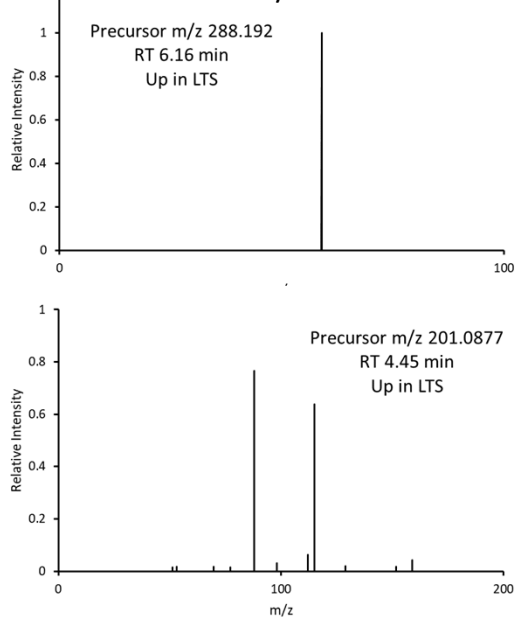

**Supplementary Fig. 4.** Accurate mass and MS<sup>2</sup> spectra of unidentified metabolites

Kim et al. Supplementary Figure 5

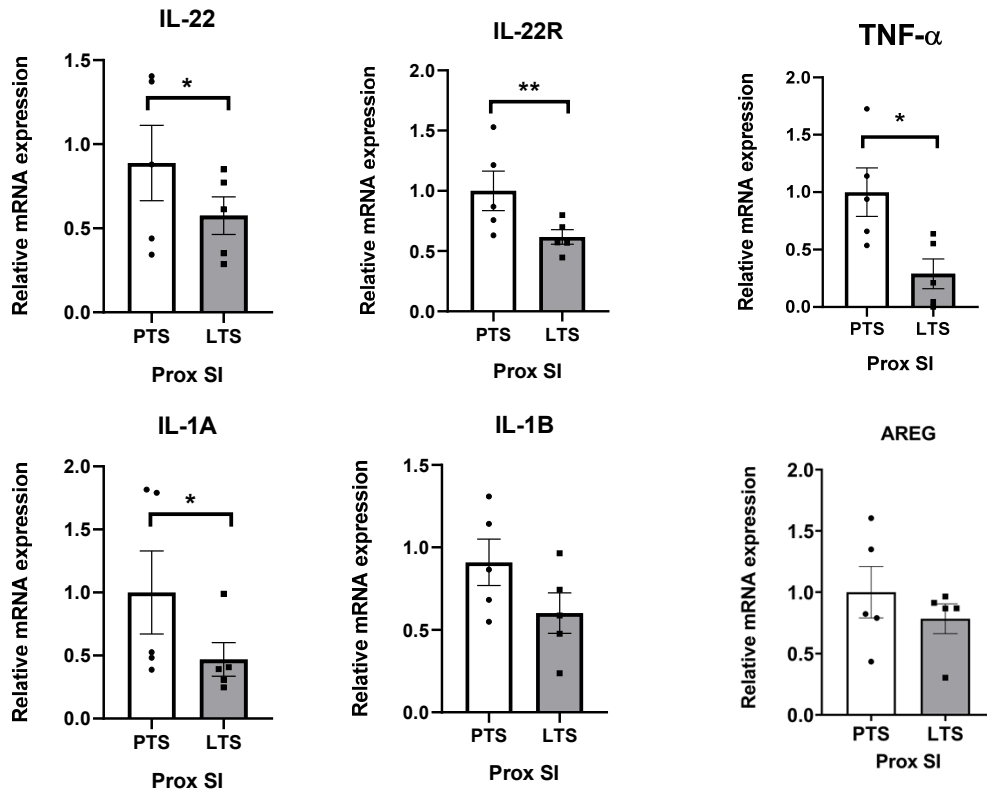

**Supplementary Figure 5.** Relative mRNA expression of intestinal immune-related genes in mucosa of proximal small intestine in GF mice associated PTS or LTS
